# Supplementary material
Source: PubMed Central journal article supplement (PMC4231579)
Supplement: hesr0049-0929-sd1.pdf [file hesr0049-0929-sd1.pdf]

Thursday, November 14, 2013  
12:56 PM

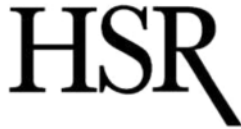

## REQUIRED INFORMATION AND FORM FOR ACCEPTED MANUSCRIPTS AT HSR [SEPT., 2009]

### *HSR Authorship Responsibility, Disclosures, and Acknowledgments*

#### **General instructions:**

The corresponding author is responsible for coordinating with each author to obtain all information disclosed on this form. This information is required to be submitted in the section on Manuscript Central labeled for the editors only, i.e., as supplementary files not for review, at the time of the first revision and should be updated as necessary for subsequent revisions or in response to queries from the editor-in-chief.

**Each author** must read and provide the information to the corresponding author on:

- (1) Authorship Responsibility, Criteria, and Contributions,
- (2) Financial Disclosures, and
- (3) Other Disclosures,

The **corresponding author** must complete and submit on behalf of all authors the summary form, affirming the

|                                                                                                                                                                                                                |
|----------------------------------------------------------------------------------------------------------------------------------------------------------------------------------------------------------------|
| information in this form. The information provided on this form will be used to generate the Acknowledgment/ Disclosure Statement and summarized authors' answers in the Acknowledgment/ Disclosure Statement. |
|----------------------------------------------------------------------------------------------------------------------------------------------------------------------------------------------------------------|

scriptcentral.com/hsr. If necessary, it may be photocopied

This form is available online at [HSR.org](http://HSR.org) and <http://mc.manuscriptcentral.com/hsr> and distributed to coauthors or other contributors.

tion. The joint acknowledgement/disclosure statement and acknowledgement/disclosure statement (including any draft version. Each form will be approved by the editors to make sure that all necessary and relevant information that readers need to know to evaluate the work published in HSR has been reflected. disclosures will not be published.

**NOTICE:** We require this form to be completed before publication. The joint acknowledgement/disclosure statement and author matrix will be published electronically; the joint acknowledgement/disclosure statement will also appear in the print version that all necessary and relevant information that readers need to know to evaluate the work published in HSR has been reflected in the acknowledgement/disclosure paragraph; data

information from each co-author and provide that information in a draft form. The corresponding author should then prepare a draft joint acknowledgement/disclosure statement and author matrix. The corresponding author should review and approve of the final joint statement and authorship

The corresponding author should collect the disclosure information for each author and enter it in the appropriate box below. The corresponding author should submit the joint acknowledgement/disclosure statement along with the author matrix. Each author should submit their disclosure information.

and author matrix may undergo some negotiation with the editor to include some that should be disclosed. As only the editor-in-chief at Manuscript Central, he or she will coordinate the process. All authors should provide their disclosure information to the corresponding author. The corresponding author may submit their disclosure information during our processing of the manuscript. This material will be reviewed for consistency and completeness when the manuscript is close to acceptance.

The wording of the acknowledgement/disclosure statement and author matrix will be reviewed by the editors, either to eliminate some material that is not needed or to add information. The corresponding author can upload information to Manuscript Central. All authors should submit drafts of their disclosures electronically to the corresponding author and a draft of the joint statement electronically at any time. The joint acknowledgement/disclosure statement will be reviewed for consistency and completeness when the manuscript is close to acceptance.

**Health Services Research  
Certification and Disclosures by Authors**

**Manuscript Number: HSR-** 13-0454  
 [After submitting your manuscript online, your manuscript is assigned a number that must be entered in the space above].

Corresponding Author: John T. Schousboe, MD, PhD

**Please fill in the following table: AUTHOR ORDER AND CONTACT INFORMATION**

| <b>Authors, in preferred order for publication</b> | <b>Telephone Number</b> | <b>Fax Number</b> | <b>e-mail address</b>   |
|----------------------------------------------------|-------------------------|-------------------|-------------------------|
| John T. Schousboe                                  | 952-993-3877            | 952-993-1312      | schouj@parknicollet.com |
| Misti L. Paudel                                    | 612-626-7545            | 612-624-0315      | ames0074@umn.edu        |
| Brent C. Taylor                                    | 612-467-4941            | 612-624-0315      | taylorbc@umn.edu        |
| Lih-Wen Mah                                        | 952-649-1145            | none available    | mahlhwen@yahoo.com      |
| Beth A. Virnig                                     | 612-624-4426            | 612-378-4866      | virni001@umn.edu        |
| Kristine E. Ensrud                                 | 612-725-2158            | 612-725-2284      | ensru001@umn.edu        |
| Bryan E. Dowd                                      | 612-624-5468            | 612-624-2196      | dowdx@umn.edu           |
|                                                    |                         |                   |                         |
|                                                    |                         |                   |                         |
|                                                    |                         |                   |                         |
|                                                    |                         |                   |                         |
|                                                    |                         |                   |                         |
|                                                    |                         |                   |                         |
|                                                    |                         |                   |                         |
|                                                    |                         |                   |                         |
|                                                    |                         |                   |                         |
|                                                    |                         |                   |                         |

**INSTRUCTIONS: EACH AUTHOR MUST READ SECTIONS 1-3 AND PROVIDE FULL DISCLOSURE TO THE CORRESPONDING AUTHOR. THE SUBMITTED FORM SHOULD PROVIDE INDIVIDUAL**

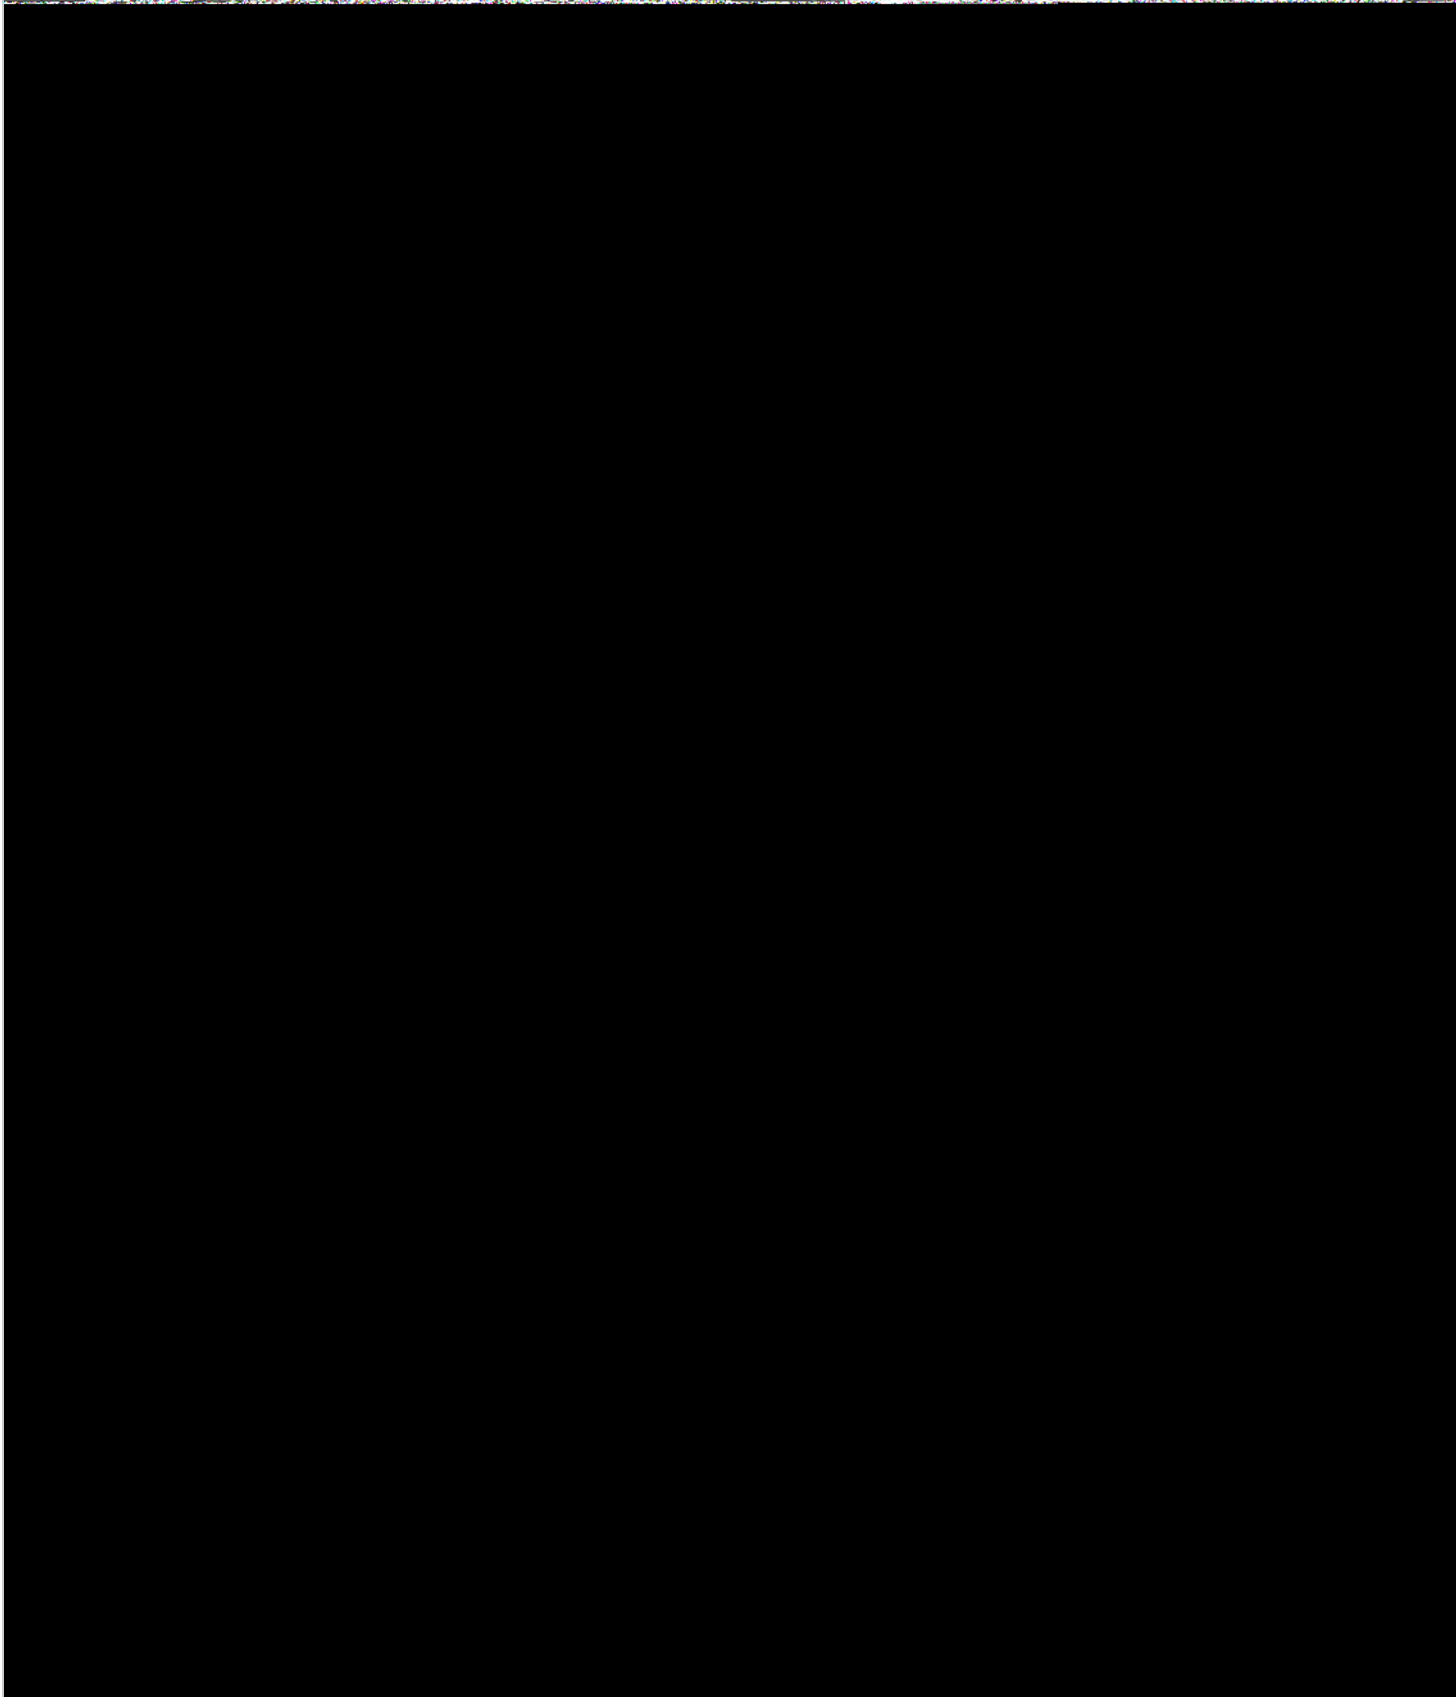

**Please check the appropriate boxes below (applies to the past five years and foreseeable future):**

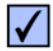

a. I have no relevant financial interests pertaining to this manuscript.

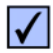

b. I certify that all my conflicts of interest, including specific financial interests and relationships and affiliations relevant to the subject matter or materials discussed in the manuscript (e.g., employment / affiliation, grants or

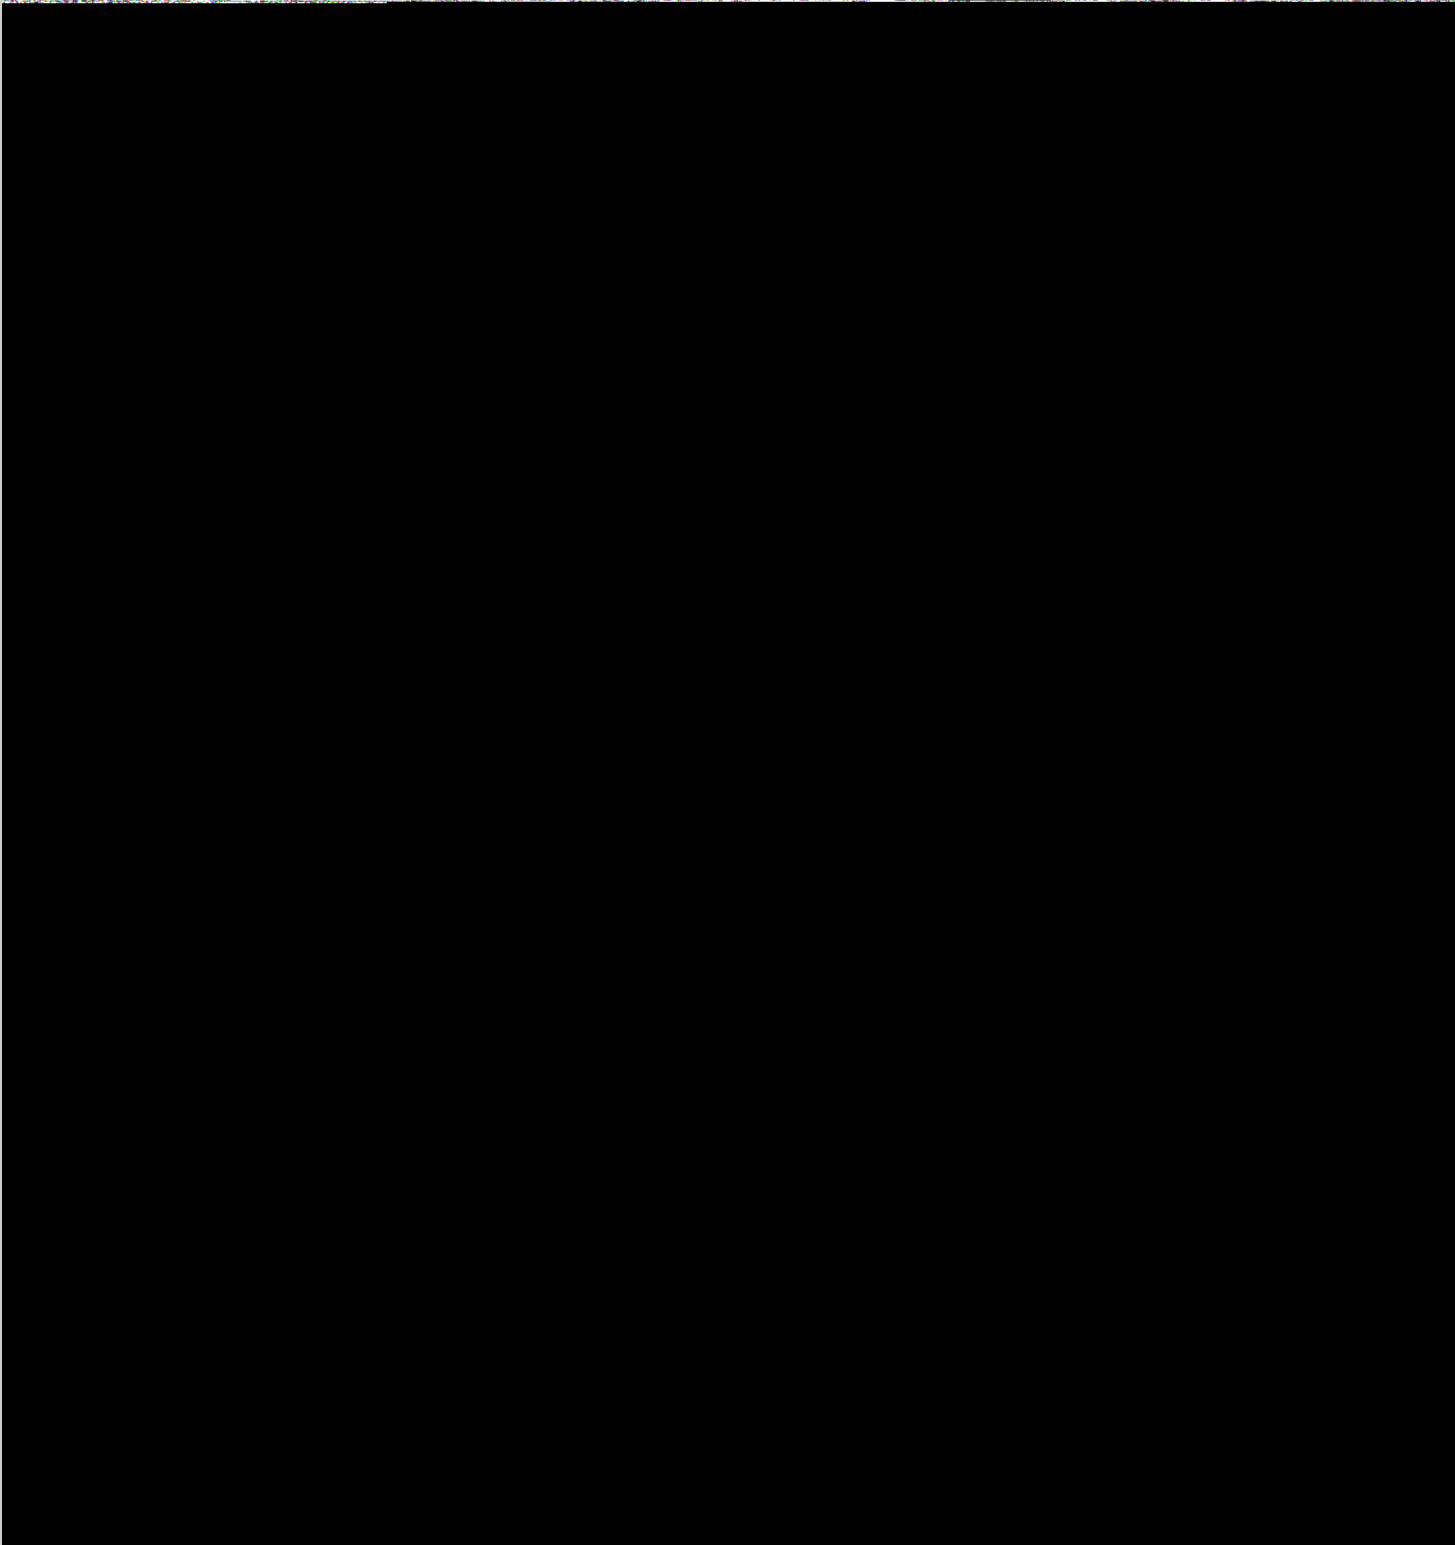

IN THE SUBMITTED FORM, THE CORRESPONDING AUTHOR SHOULD PROVIDE DETAILS FOR EACH AUTHOR [NAMED] WHO HAS CHECKED ANY BOX i THROUGH iv.

Please describe:

A contractual right by a sponsor, supporter, or employer to review and approve (and hence censor) a manuscript makes it appear to be a "work for hire" rather than research. On occasion such work may warrant publication in HSR, e.g., because it illustrates novel methods, but we will be reluctant to accept a manuscript with findings or conclusions that might be influenced by the ability of the sponsor to withhold permission to publish.

... a particular advocacy position relevant to the manuscript, or without compensation) that are identified with

ONDING AUTHOR SHOULD PROVIDE DETAILS FOR EACH BOX b.

IN THE SUBMITTED FORM, THE CORRESPONDING AUTHOR [NAMED] WHO HAS CHECKED BOX b.

..., to develop a curriculum to recognize vertebral fractures on lateral recognition of radiographic vertebral fractures in Shanghai, China, in ancancy fees was January through July, 2011.

Please describe:  
Dr. Schousboe was paid consultant fees by Merck, Inc spine and chest radiographs, and to teach a course on 2011. The time period over which he was paid consult

was, at the time of the manuscript's preparation) affiliated (as a nt position) is identified with a particular advocacy position relevant

c. The organization with which I am currently (or spokesperson, board member, or similar prominent to the manuscript.

ONDING AUTHOR SHOULD PROVIDE DETAILS FOR EACH BOX c.

IN THE SUBMITTED FORM, THE CORRESPONDING AUTHOR [NAMED] WHO HAS CHECKED BOX c.

Attributable to Hip th funding. The National Institute on Aging (NIA) provides support 01A1. ted by National Institutes of Health funding. The National Institute 5582, R01 AR35583, R01 AR35584, 6

Please describe:  
The "Predictors of Health Care Utilization and Costs Fractures" is supported by National Institutes of Health under the following grant number: 1 R01 AG38415-0 "The Study of Osteoporotic Fractures (SOF) is supported on Aging (NIA) provides support under the following grant numbers: R01 AG005407, R01 AR3 R01 AG005394, R01 AG027574, and R01 AG02757

... d. I certify I agree with the description in the A...

**4.A. Author matrix.** Please complete the authorship matrix affirming which roles each author has fulfilled. To be listed as an author, persons should have made contributions in both of the shaded areas; all others should be acknowledged as contributors. In the box in 4.B., we invite you to name other contributors. In addition, you may use the box in 4.B. if you wish to name other kinds of contributions by authors.

Section 4 A. and B. will be made available in the electronic version of accepted manuscripts.

\*You may wish to copy the author's names from the box on page 2.

| Manuscript Number:<br>HSR-13-0454 | Each author must check at least one blue box showing important contributions to: |                                                  |                                     | & check contributions in at least one orange box: |                                                      |
|-----------------------------------|----------------------------------------------------------------------------------|--------------------------------------------------|-------------------------------------|---------------------------------------------------|------------------------------------------------------|
|                                   | Conception and design                                                            | Acquisition of data (arranging for or obtaining) | Analysis and interpretation of data | Drafting the manuscript                           | Critical revision for important intellectual content |
| Name of Each Author*              |                                                                                  |                                                  |                                     |                                                   |                                                      |
| John T. Schousboe                 | <input checked="" type="checkbox"/>                                              | <input type="checkbox"/>                         | <input checked="" type="checkbox"/> | <input checked="" type="checkbox"/>               | <input checked="" type="checkbox"/>                  |
| Misti L. Paudel                   | <input type="checkbox"/>                                                         | <input checked="" type="checkbox"/>              | <input checked="" type="checkbox"/> | <input type="checkbox"/>                          | <input checked="" type="checkbox"/>                  |
| Brent C. Taylor                   | <input type="checkbox"/>                                                         | <input checked="" type="checkbox"/>              | <input checked="" type="checkbox"/> | <input type="checkbox"/>                          | <input checked="" type="checkbox"/>                  |
| Lih-Wen Mah                       | <input type="checkbox"/>                                                         | <input checked="" type="checkbox"/>              | <input type="checkbox"/>            | <input type="checkbox"/>                          | <input checked="" type="checkbox"/>                  |
| Beth A. Virnig                    | <input checked="" type="checkbox"/>                                              | <input type="checkbox"/>                         | <input checked="" type="checkbox"/> | <input type="checkbox"/>                          | <input checked="" type="checkbox"/>                  |
| Kristine E. Ensrud                | <input type="checkbox"/>                                                         | <input type="checkbox"/>                         | <input checked="" type="checkbox"/> | <input type="checkbox"/>                          | <input checked="" type="checkbox"/>                  |
| Bryan E. Dowd                     | <input checked="" type="checkbox"/>                                              | <input type="checkbox"/>                         | <input checked="" type="checkbox"/> | <input checked="" type="checkbox"/>               | <input checked="" type="checkbox"/>                  |
|                                   | <input type="checkbox"/>                                                         | <input type="checkbox"/>                         | <input type="checkbox"/>            | <input type="checkbox"/>                          | <input type="checkbox"/>                             |
|                                   | <input type="checkbox"/>                                                         | <input type="checkbox"/>                         | <input type="checkbox"/>            | <input type="checkbox"/>                          | <input type="checkbox"/>                             |
|                                   | <input type="checkbox"/>                                                         | <input type="checkbox"/>                         | <input type="checkbox"/>            | <input type="checkbox"/>                          | <input type="checkbox"/>                             |
|                                   | <input type="checkbox"/>                                                         | <input type="checkbox"/>                         | <input type="checkbox"/>            | <input type="checkbox"/>                          | <input type="checkbox"/>                             |
|                                   | <input type="checkbox"/>                                                         | <input type="checkbox"/>                         | <input type="checkbox"/>            | <input type="checkbox"/>                          | <input type="checkbox"/>                             |
|                                   | <input type="checkbox"/>                                                         | <input type="checkbox"/>                         | <input type="checkbox"/>            | <input type="checkbox"/>                          | <input type="checkbox"/>                             |
|                                   | <input type="checkbox"/>                                                         | <input type="checkbox"/>                         | <input type="checkbox"/>            | <input type="checkbox"/>                          | <input type="checkbox"/>                             |

**Section 4.B. Other Contributions**

Some research projects involve very extensive teams with many people who do not meet the criteria for authorship but who have contributed importantly to the work. The box below is designed to acknowledge other types of contributions. As appropriate, use this box to name other people who have made important contributions to the work reported in this manuscript. Please also name people who have played a significant role in preparing the manuscript but who are not listed as authors. NOTE: If you wish to acknowledge any of these contributors in print, please include their names and roles in the joint acknowledgment section below.

|                                                  |
|--------------------------------------------------|
| Please name contributors to be acknowledged for: |
| Statistical analysis                             |
|                                                  |
| Data collection (under supervision)              |
|                                                  |
| Interviewing (under supervision)                 |
|                                                  |
| Programming and data management                  |
|                                                  |
| Editing for presentation or style                |
|                                                  |
| Obtaining funding                                |
|                                                  |
| Administrative, technical, or material support   |
|                                                  |
| Supervision of research staff                    |
|                                                  |
| Other (specify)                                  |
|                                                  |



**INSTRUCTIONS: THE CORRESPONDING AUTHOR MUST FILL OUT SECTION 5.**

**5. Joint Acknowledgment/Disclosure Statement.** Please enter a 1-3 sentence statement that acknowledges all forms of financial and material support for the project, the roles of key individuals who should be recognized; (this may or may not extend to everyone listed as contributors). Please also include summary statements about what you feel are the conflicts of interests and disclosures without which some readers may feel that important relevant information is being withheld. The editors will determine whether these disclosures are sufficient or excessive and may return a revised version. All authors will need to approve the final version. As appropriate, please add at the end of your statement: 'Disclosures: None' or 'No Other Disclosures'.

Section 5 will be made available in both the electronic and print version of accepted manuscripts.

**Joint Acknowledgement/Disclosure Statement:**

This study was done as part of the grant project "Predictors of Health Care Utilization and Costs Attributable to Hip Fracture", which is an ancillary RO1 project to the Study of Osteoporotic Fractures. None of the authors have any conflicts of interest relevant to this project. One author (Dr. Schousboe) received consultant fees from Merck, Inc., for a project in 2011 unrelated to this paper. The conceptual design of the study was primarily from Dr.s Schousboe and Dowd, with input from Dr's Virnig and Ensrud. All data acquisition was accomplished by Ms. Paudel, Dr. Taylor, and Dr. Mah. Data analysis was done by Dr. Schousboe, will all authors weighing in on data interpretation. All authors had critical input to the revisions of the manuscript before the first submission to HSR, and have weighed on the submission of the current revision.

**The corresponding** author should obtain permission to name all individuals named in an Acknowledgment or the Contributorship Section because readers may infer their endorsement of data and conclusions.

**The corresponding author must check the box below to affirm his/her certification that:**

- all persons who have made substantial contributions to the work reported in this manuscript (e.g., data collection, analysis, or writing or editing assistance) but who do not fulfill the authorship criteria are named with their specific contributions in the Contributorship Box associated with the manuscript.
- all persons named in the Contributorship box have provided me with permission to be named.
- no other persons have made substantial contributions to this manuscript.
- all authors have approved the Joint Acknowledgement/Disclosure Statement intended for publication and the author matrix.

I, the corresponding author, certify that the above statements are true.

(Adapted, with permission, from the Journal of the American Medical Association, 2006)
